# Supplementary material for: Tumor Infiltrating Neutrophils Are Frequently Found in Adenocarcinomas of the Biliary Tract and Their Precursor Lesions with Possible Impact on Prognosis
Source: MDPI journal article supplement (doi:10.3390/jpm11030233), 2021-03-23
Supplement: s1 [file s1]

**Supplementary Table S1.** Results of the multivariate analysis (Overall survival, OS; Hazard ratio, HR; Confidence interval, CI).

| Endpoint | Subgroup                 | HR    | CI 95%      | <i>p</i> |
|----------|--------------------------|-------|-------------|----------|
| OS       | Stage 2 vs 1             | 5.93  | 0.73–48.17  | 0.096    |
|          | Stage 3 vs 1             | 22.64 | 2.41–212.41 | 0.006    |
|          | Stage 4 vs 1             | 8.37  | 0.66–106.20 | 0.101    |
|          | TIN low vs high          | 10.27 | 1.28–82.69  | 0.029    |
|          | TIN intermediate vs high | 40.01 | 3.73–428.97 | 0.002    |

**Supplementary Table S2:** Patient characteristics of the PSC-LTX and PSC-BTC cohort.

|     |   | PSC-LTX                 | PSC-BTC                 |
|-----|---|-------------------------|-------------------------|
|     |   | n, median<br>(% or IQR) | n, median<br>(% or IQR) |
| N   |   | 27                      | 7                       |
| Sex | W | 9 (33.3)                | 4 (57.1)                |
|     | M | 18 (66.7)               | 3 (42.9)                |
| Age |   | 46.7 (39.5 - 51.8)      | 48.0 (43.9 - 54.6)      |
